# Supplementary material for: Enhancing Social-Emotional Health and Wellbeing in the Early Years (E-SEE): a study protocol of a community-based randomised controlled trial with process and economic evaluations of the incredible years infant and toddler parenting programmes, delivered in a proportionate universal model
Source: PubMed Central journal article supplement — BMJ Open. 2018 Dec 19;8(12):e026906. doi: 10.1136/bmjopen-2018-026906 (PMC6303737; doi:10.1136/bmjopen-2018-026906), 2018-12-19
Supplement: bmjopen-2018-026906.reviewer_comments.pdf [file bmjopen-2018-026906.reviewer_comments.pdf]

## PEER REVIEW HISTORY

BMJ Open publishes all reviews undertaken for accepted manuscripts. Reviewers are asked to complete a checklist review form (<http://bmjopen.bmj.com/site/about/resources/checklist.pdf>) and are provided with free text boxes to elaborate on their assessment. These free text comments are reproduced below.

## ARTICLE DETAILS

|                            |                                                                                                                                                                                                                                                                                                   |
|----------------------------|---------------------------------------------------------------------------------------------------------------------------------------------------------------------------------------------------------------------------------------------------------------------------------------------------|
| <b>TITLE (PROVISIONAL)</b> | Enhancing Social-Emotional Health and Wellbeing in the Early Years (E-SEE): A Study Protocol of a Community-based Randomised Controlled Trial with Process and Economic Evaluations of the Incredible Years Infant and Toddler Parenting Programmes, delivered in a Proportionate Universal Model |
| <b>AUTHORS</b>             | Bywater, Tracey; Berry, Vashti; Blower, Sarah; Cohen, Judith; Gridley, Nicole; Kiernan, Kathleen; Mandefield, Laura; Mason-Jones, Amanda; McGilloway, Sinead; McKendrick, Kirsty; Pickett, Kate; Richardson, Gerry; Teare, M; Tracey, Louise; Walker, Simon; Whittaker, Karen; Wright, Jessica;   |

This article was not externally reviewed at BMJ Open. Protocols that have been independently assessed prior to submission to BMJ Open are usually fast-tracked to publication on the grounds that further substantial changes will not be possible. This independent assessment will usually be external, independent review for both a substantial grant award from a non-commercial or government funder and ethics approval.
